# Supplementary material
Source: PubMed Central journal article supplement (PMC3692371)
Supplement: NIHMS346288-supplement-1.pdf [file NIHMS346288-supplement-1.pdf]

## Supplemental Material

**Supplemental Table 1. Potential Covariates in HF-ACTION Predictive Models for Primary Endpoint**

|    | Variable                                                  |
|----|-----------------------------------------------------------|
| 1  | Age                                                       |
| 2  | Sex                                                       |
| 3  | Race                                                      |
| 4  | History of myocardial infarction                          |
| 5  | Previous revascularization                                |
| 6  | History of diabetes                                       |
| 7  | History of peripheral vascular disease                    |
| 8  | Smoking status                                            |
| 9  | History of chronic obstructive pulmonary disease          |
| 10 | Heart failure hospitalizations in last 6 months           |
| 11 | Hospitalizations in last 6 months                         |
| 12 | Etiology of heart failure                                 |
| 13 | New York Heart Association Class (II versus III/IV)       |
| 14 | Canadian Angina Class                                     |
| 15 | Baseline automated implantable cardioverter/defibrillator |
| 16 | Baseline biventricular pacemaker                          |
| 17 | Baseline pacemaker                                        |
| 18 | Atrial fibrillation/flutter                               |
| 19 | Mitral regurgitation grade by echocardiography            |
| 20 | Systolic blood pressure                                   |
| 21 | Diastolic blood pressure                                  |
| 22 | Baseline heart rate                                       |
| 23 | Body mass index                                           |
| 24 | Left ventricular ejection fraction                        |
| 25 | KCCQ: total symptom score                                 |
| 26 | KCCQ: quality of life score                               |
| 27 | KCCQ: self-efficacy score                                 |
| 28 | KCCQ: symptom stability score                             |
| 29 | KCCQ: physical limitation score                           |
| 30 | KCCQ: social limitation score                             |

**Supplemental Table 1. Potential Covariates in HF-ACTION Predictive Models for Primary Endpoint**

|    | Variable                                               |
|----|--------------------------------------------------------|
| 31 | Beck Depression Index II                               |
| 32 | Heart rate reserve on CPX test                         |
| 33 | Heart rate at peak exercise on CPX test                |
| 34 | Heart rate at end of 2 <sup>nd</sup> stage of CPX test |
| 35 | Exercise duration on CPX test                          |
| 36 | Rest ECG rhythm on CPX test                            |
| 37 | Peak oxygen pulse on CPX test                          |
| 38 | Peak respiratory exchange ratio on CPX test            |
| 39 | Ventricular conduction prior to CPX test               |
| 40 | $V_E/V_{CO_2}$ slope                                   |
| 41 | Peak $VO_2$                                            |
| 42 | Weber class                                            |
| 43 | Six-minute walk distance                               |
| 44 | Serum creatinine                                       |
| 45 | Sodium                                                 |
| 46 | Blood urea nitrogen                                    |
| 47 | Hemoglobin                                             |
| 48 | Treatment group (exercise vs. usual care)              |

CPX, cardiopulmonary exercise test; ECG, electrocardiogram; KCCQ, Kansas City Cardiomyopathy Questionnaire;  $V_E/V_{CO_2}$ , volume of air exhaled/volume of  $CO_2$  exhaled;  $VO_2$ , oxygen consumption

**Supplemental Table 2. Full Predictive Model for Primary Endpoint**

| Parameter                                               | Average $\chi^2$ | <i>P</i> | HR (CI)          |
|---------------------------------------------------------|------------------|----------|------------------|
| Blood urea nitrogen (HR for 10 mg/dL increase)          | 30.4             | <0.0001  | 1.07 (1.04-1.09) |
| KCCQ symptom stability                                  |                  |          |                  |
| Much worse/slightly worse                               | 34.1             | <0.0001  | 1.65 (1.38-1.97) |
| Much better/slightly better                             |                  |          | 1.22 (1.07-1.39) |
| KCCQ total symptom score (HR for 5-unit increase)       | 23.4             | <0.0001  | 0.97 (0.96-0.98) |
| Weber class                                             |                  |          |                  |
| B (Peak VO <sub>2</sub> 16.1-20)                        |                  |          | 0.96 (0.77-1.19) |
| C (Peak VO <sub>2</sub> 10.1-16)                        | 26.0             | <0.0001  | 1.36 (1.09-1.69) |
| D (Peak VO <sub>2</sub> ≤10)                            |                  |          | 1.55 (1.17-2.05) |
| Left ventricular ejection fraction (HR for 5% increase) | 18.0             | <0.0001  | 0.93 (0.89-0.96) |
| Exercise duration on CPX test (HR for 1-min increase)   | 17.3             | <0.0001  | 0.96 (0.94-0.98) |
| Ventricular conduction prior to CPX                     |                  |          |                  |
| Left bundle branch block                                |                  |          | 1.07 (0.92-1.25) |
| Right bundle branch block                               | 24.3             | 0.0001   | 1.38 (1.07-1.77) |
| Intraventricular conduction delay                       |                  |          | 1.24 (1.06-1.46) |
| Paced                                                   |                  |          | 1.35 (1.18-1.54) |
| Sex: female                                             | 15.0             | 0.0001   | 0.79 (0.70-0.89) |
| Mitral regurgitation: severe                            | 13.7             | 0.0002   | 1.32 (1.14-1.52) |
| Race                                                    |                  |          |                  |
| Black or African American                               | 5.7              | 0.0575   | 1.11 (0.99-1.25) |
| Other                                                   |                  |          | 1.24 (0.99-1.56) |

CI, confidence interval; CPX test, cardiopulmonary exercise test; HR, hazard ratio; KCCQ, Kansas City Cardiomyopathy Questionnaire; VO<sub>2</sub>, oxygen consumption.

Reference categories: KCCQ symptom stability=no change or no symptoms; Weber Class=A; ventricular conduction=normal; sex=male; mitral regurgitation=non-severe/none; race= white

**Supplemental Table 3. Full Predictive Model for Mortality Endpoint**

| Parameter                                                         | Average $\chi^2$ | P value | HR (CI)          |
|-------------------------------------------------------------------|------------------|---------|------------------|
| Exercise duration on CPX test (HR for 1-min increase)             | 118.0            | <0.0001 | 0.84 (0.81-0.86) |
| Sex: female                                                       | 18.2             | <0.0001 | 0.56 (0.43-0.73) |
| BMI (HR for a 2 kg/m <sup>2</sup> increase, truncated above 25)   | 13.5             | 0.0002  | 0.80 (0.70-0.90) |
| Serum creatinine (HR for 0.1 mg/dL increase, truncated above 2.3) | 12.1             | 0.0005  | 1.04 (1.02-1.07) |
| Mitral regurgitation: severe                                      | 7.9              | 0.0049  | 1.45 (1.12-1.88) |
| Left ventricular ejection fraction (HR for 5% increase)           | 7.8              | 0.0051  | 0.90 (0.84-0.97) |
| Blood urea nitrogen (HR for 10 mg/dL increase)                    | 6.7              | 0.0097  | 1.06 (1.01-1.10) |
| Ventricular conduction prior to CPX                               |                  |         |                  |
| Left bundle branch block                                          |                  |         | 0.76 (0.55-1.06) |
| Right bundle branch block                                         | 12.9             | 0.0120  | 1.35 (0.86-2.12) |
| Intraventricular conduction delay                                 |                  |         | 1.09 (0.79-1.51) |
| Paced                                                             |                  |         | 1.32 (1.02-1.71) |
| Diastolic blood pressure (HR for 5 mm Hg increase)                | 5.6              | 0.0175  | 0.94 (0.90-0.99) |
| Canadian Angina Classification                                    |                  |         |                  |
| 1                                                                 |                  |         | 1.23 (0.87-1.74) |
| ≥2                                                                | 6.8              | 0.0338  | 0.62 (0.40-0.94) |

BMI, body mass index; CI, confidence interval; CPX test, cardiopulmonary exercise test; Hg, mercury; HR., hazard ratio;

Reference categories: Sex=male; mitral regurgitation=non-severe/none; ventricular conduction=normal; Canadian Angina Classification=0
